# Supplementary material for: Patterns of mental health services and mood disorder disability pensions: a standard comparison of Finland’s three largest hospital districts
Source: Springer Nature journal article supplement (doi:10.1186/s12888-023-05342-2), 2023-11-13

Additional File 1. DESDE-LTC classification mapping tree. Includes the Local Service variable: A = local services without gatekeeping, B = local services with gatekeeping, C = centralized services.

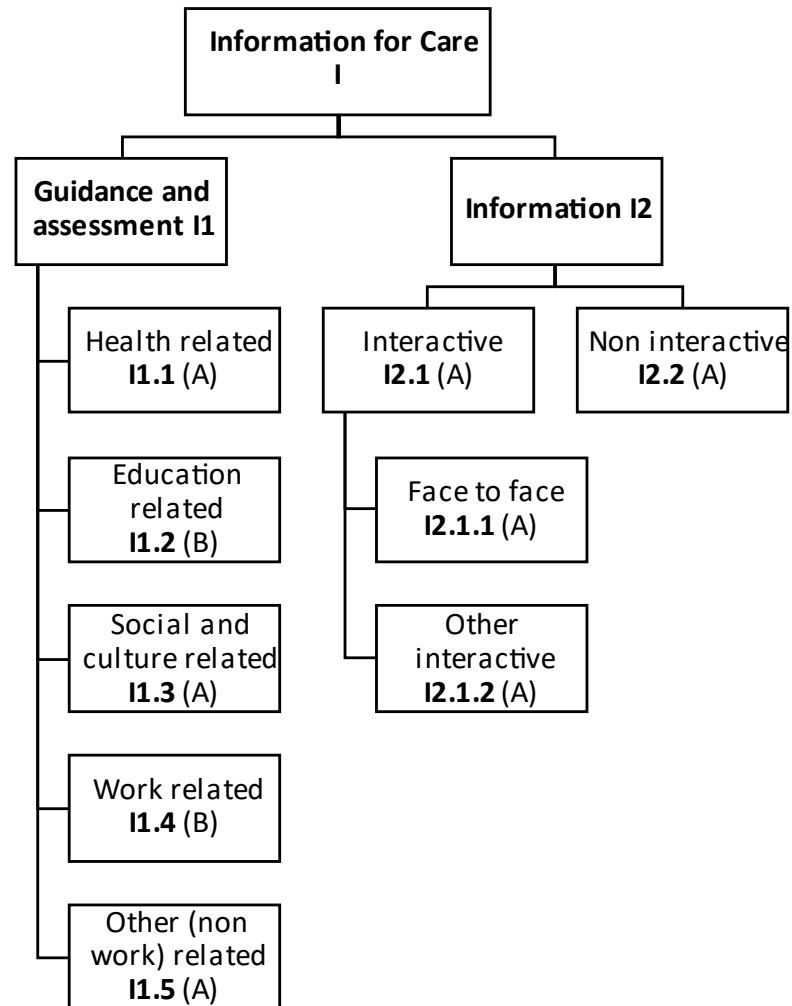

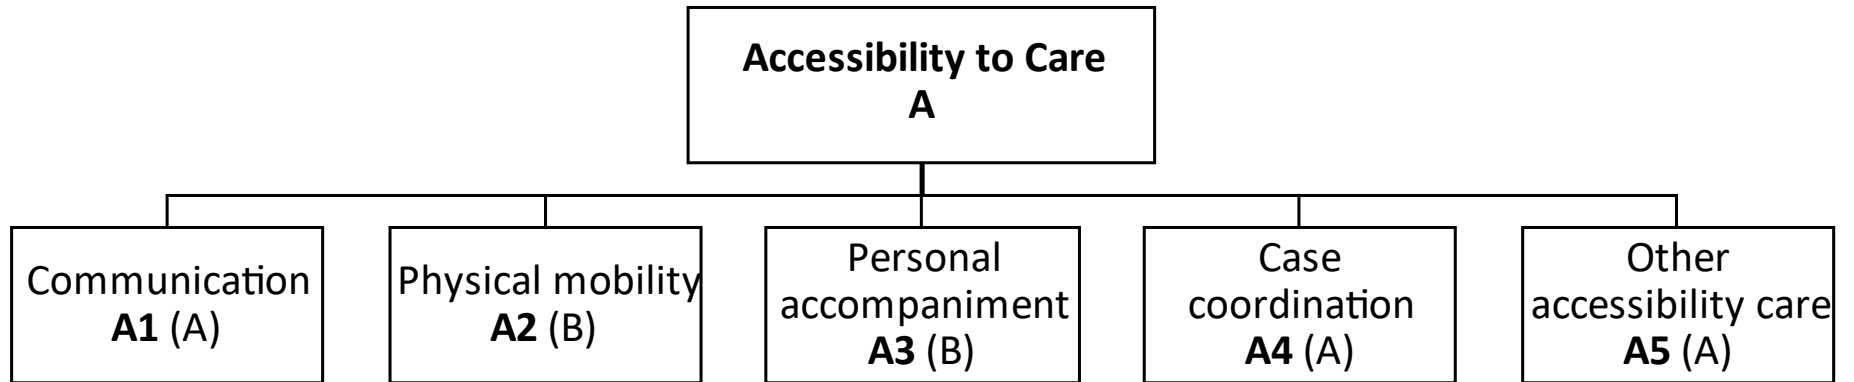

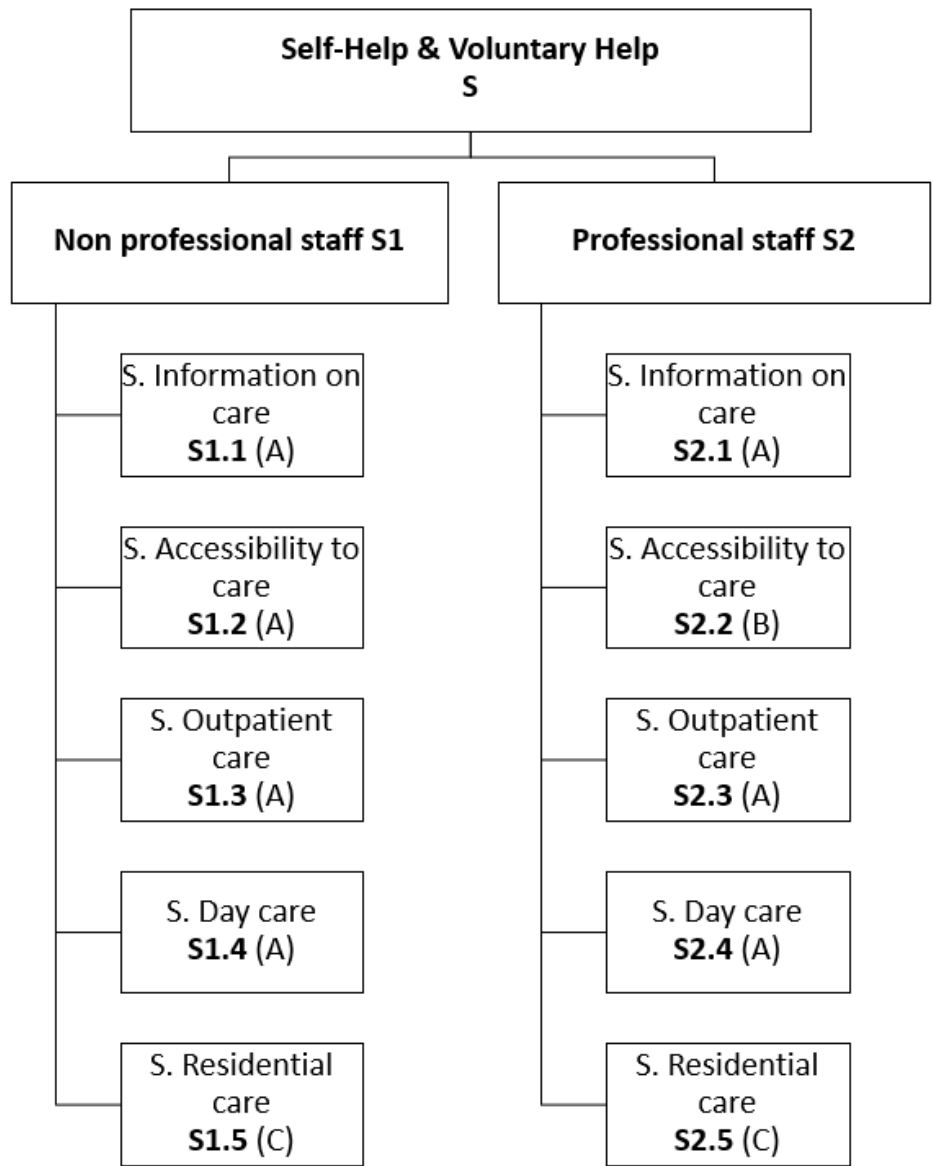

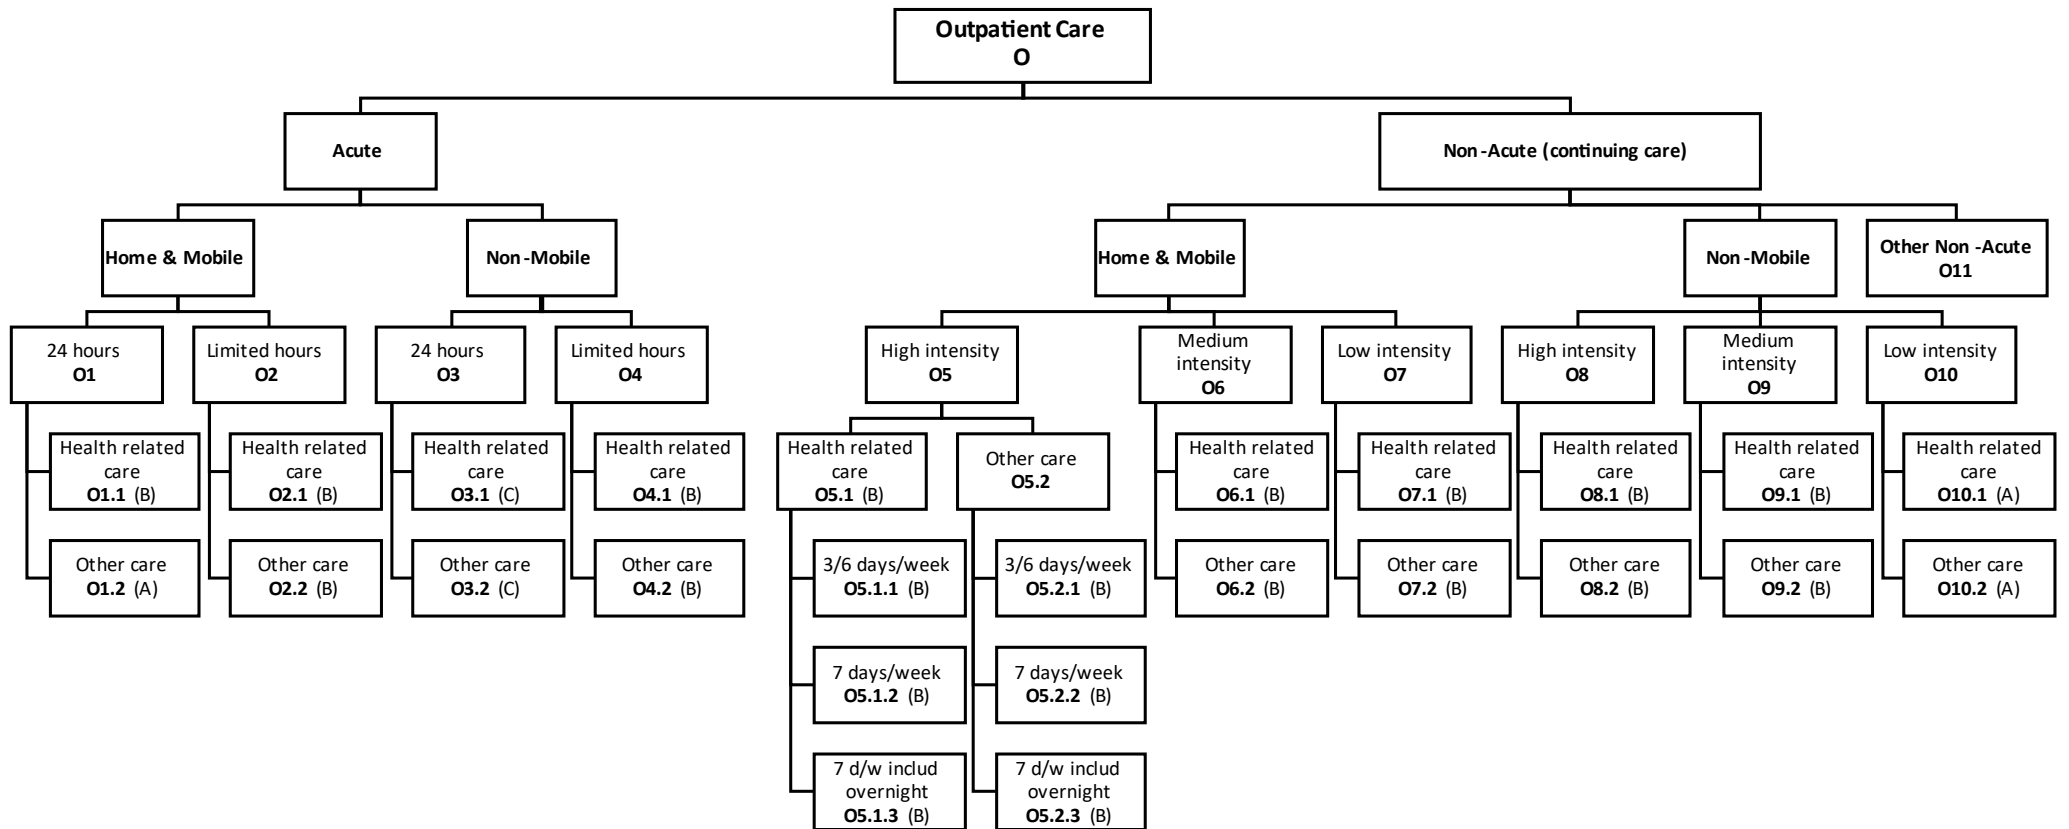

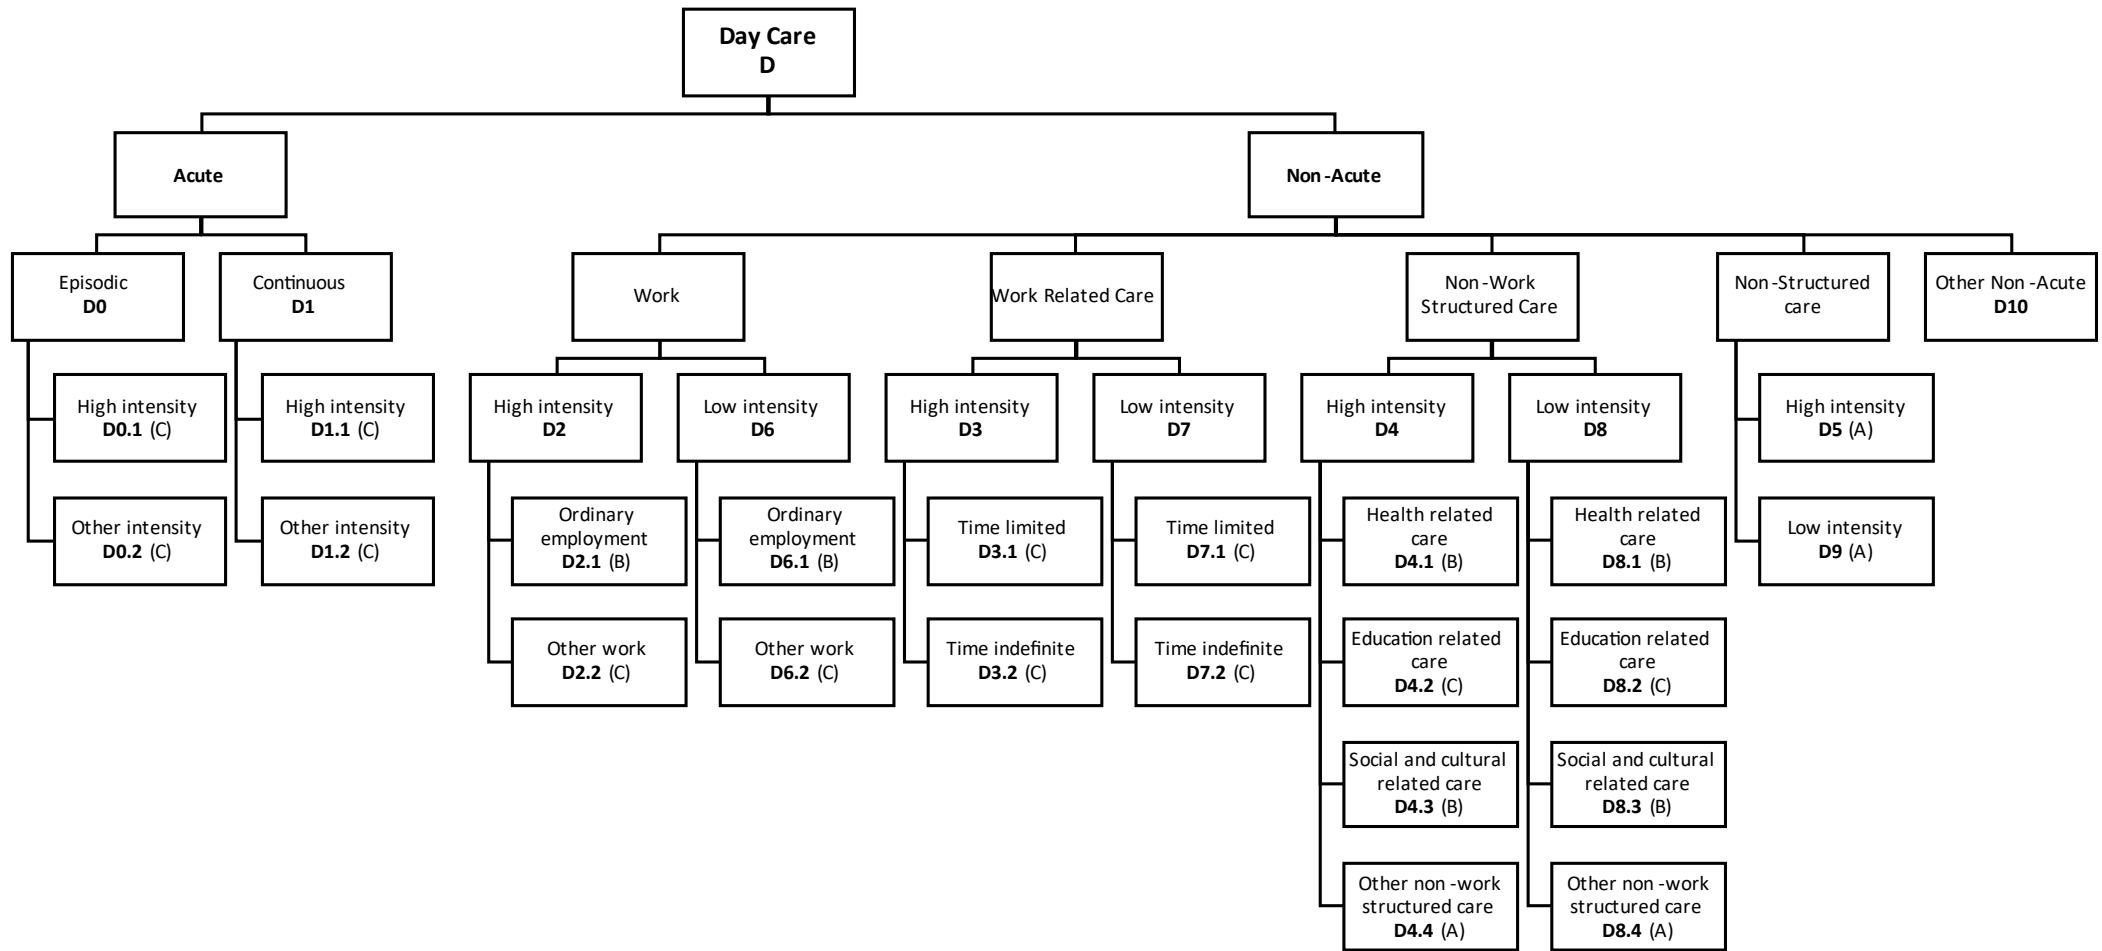

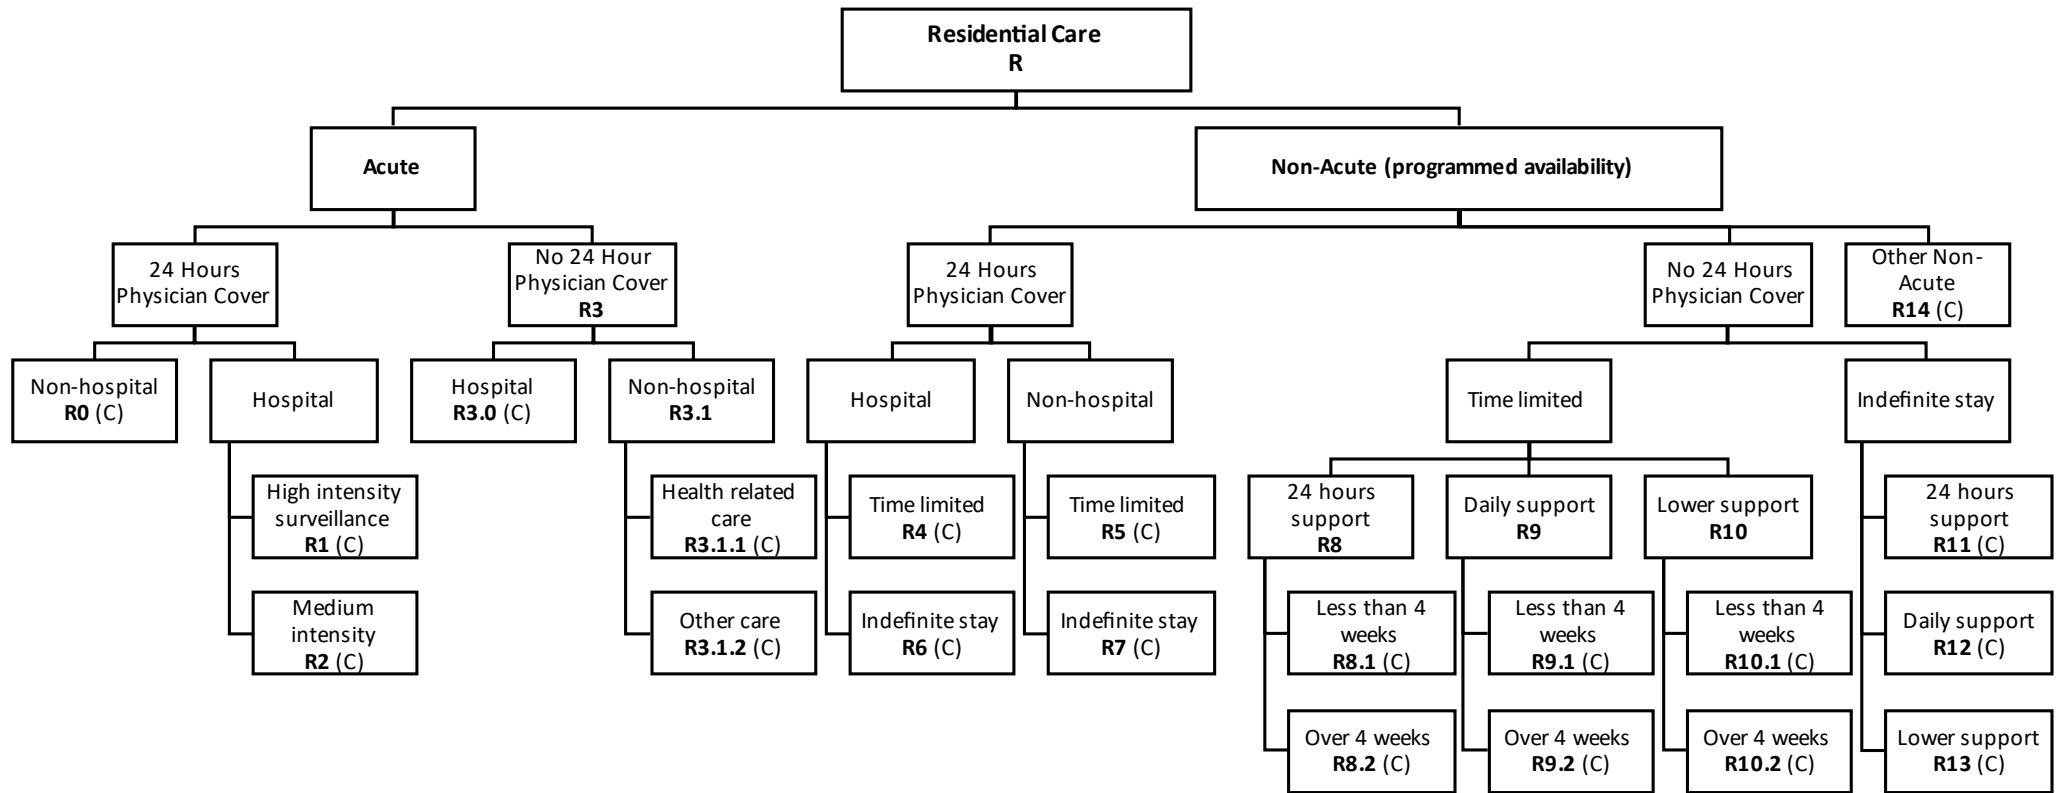

Supplement: MOESM1 [file 26297208]
