# Supplementary material for: Patterns of mental health services and mood disorder disability pensions: a standard comparison of Finland’s three largest hospital districts
Source: Springer Nature journal article supplement (doi:10.1186/s12888-023-05342-2), 2023-11-13
Supplement: MOESM3 [file 26297208]

Additional File 3. The distribution of mental health services and resources in the three largest Finnish Hospital districts according to the DESDE-LTC taxonomy. Data collected in 2012-2013.

Local Service variable classification = A: Local services without gatekeeping; B: Local services with gatekeeping; C: Centralized services

|        | Local Service - variable | MTC units                  |                   |           | FTE resources              |                   |           | FTE per 100 000 inhabitants |                   |           |
|--------|--------------------------|----------------------------|-------------------|-----------|----------------------------|-------------------|-----------|-----------------------------|-------------------|-----------|
|        |                          | Helsinki and Uusimaa (HUS) | Southwest Finland | Pirkanmaa | Helsinki and Uusimaa (HUS) | Southwest Finland | Pirkanmaa | Helsinki and Uusimaa (HUS)  | Southwest Finland | Pirkanmaa |
| O1.1   | B                        | 1                          | -                 | -         | 12                         | -                 | -         | 1.15                        | -                 | -         |
| O1.2   | A                        | -                          | 1                 | -         | -                          | 8                 | -         | -                           | 2.76              | -         |
| O2.1   | B                        | 3                          | -                 | -         | 39                         | -                 | -         | 3.73                        | -                 | -         |
| O3.1   | C                        | 2                          | -                 | 2         | 49.8                       | -                 | 9.1       | 4.76                        | -                 | 2.82      |
| O4.1   | B                        | 10                         | 5                 | 2         | 69.7                       | 50.8              | 23.7      | 6.66                        | 17.54             | 7.35      |
| O4.2   | B                        | 3                          | 3                 | -         | 14.5                       | 6.5               | -         | 1.39                        | 2.24              | -         |
| O5.1.1 | B                        | 6                          | -                 | -         | 33.2                       | -                 | -         | 3.17                        | -                 | -         |
| O5.1.2 | B                        | 2                          | 1                 | -         | 18                         | 1.5               | -         | 1.72                        | 0.52              | -         |
| O5.2.1 | B                        | 13                         | 4                 | -         | 59.7                       | 13.5              | -         | 5.71                        | 4.66              | -         |
| O5.2.2 | B                        | 1                          | -                 | -         | 8.5                        | -                 | -         | 0.81                        | -                 | -         |
| O6.1   | B                        | 4                          | -                 | 6         | 24                         | -                 | 14.1      | 2.29                        | -                 | 4.37      |
| O6.2   | B                        | -                          | 1                 | 6         | -                          | 1.5               | 20.4      | -                           | 0.52              | 6.33      |
| O7.1   | B                        | 1                          | 4                 | 1         | 3                          | 9.5               | 17        | 0.29                        | 3.28              | 5.27      |
| O7.2   | B                        | 2                          | 2                 | -         | 14.9                       | 7                 | -         | 1.42                        | 2.42              | -         |
| O8.1   | B                        | 8                          | 14                | 1         | 47.7                       | 50.2              | 9         | 4.56                        | 17.33             | 2.79      |
| O9.1   | B                        | 44                         | 3                 | 9         | 668                        | 20                | 56.7      | 63.84                       | 6.90              | 17.58     |
| O9.2   | B                        | -                          | -                 | 1         | -                          | -                 | 1         | -                           | -                 | 0.31      |
| O10.1  | A                        | 44                         | 50                | 41        | 223                        | 286.7             | 201       | 21.31                       | 98.98             | 62.34     |
| O10.2  | A                        | 1                          | 1                 | 2         | 1                          | 1                 | 14        | 0.10                        | 0.35              | 4.34      |

|        |   |    |   |    |       |       |       |       |       |       |
|--------|---|----|---|----|-------|-------|-------|-------|-------|-------|
| R2     | C | 20 | 9 | 8  | 427.9 | 184.1 | 177.4 | 40.89 | 63.56 | 55.02 |
| R3.1.1 | C | 4  | 2 | 3  | 77    | 32.9  | 43.3  | 7.36  | 11.36 | 13.43 |
| R3.1.2 | C | -  | 3 | -  | -     | 22    | -     | -     | 7.60  | -     |
| R4     | C | 10 | 5 | 1  | 273.1 | 98.4  | 20.5  | 26.10 | 33.97 | 6.36  |
| R5     | C | 1  | - | -  | 3.6   | -     | -     | 0.34  | -     | -     |
| R6     | C | 22 | 3 | 7  | 404.3 | 49.3  | 133.2 | 38.64 | 17.02 | 41.31 |
| R8     | C | 1  | - | -  | 22    | -     | -     | 2.10  | -     | -     |
| R8.1   | C | 7  | - | 2  | 87.1  | -     | 27.3  | 8.32  | -     | 8.47  |
| R8.2   | C | 4  | 5 | 3  | 82.5  | 35.6  | 19.7  | 7.88  | 12.29 | 6.11  |
| R9     | C | 2  | - | -  | 23.2  | -     | -     | 2.22  | -     | -     |
| R9.1   | C | 1  | - | -  | 3.6   | -     | -     | 0.34  | -     | -     |
| R9.2   | C | 3  | 3 | 9  | 30    | 9     | 22.5  | 2.87  | 3.11  | 6.98  |
| R14    | C | 4  | - | -  | 14    | -     | -     | 1.34  | -     | -     |
| D0.1   | C | -  | 1 | -  | -     | 7     | -     | -     | 2.42  | -     |
| D1.2   | C | 9  | 1 | 6  | 53    | 4     | 30.8  | 5.07  | 1.38  | 9.55  |
| D2.2   | C | 2  | 1 | -  | 2     | 1     | -     | 0.19  | 0.35  | -     |
| D3     | C | -  | - | 1  | -     | -     | 1     | -     | -     | 0.31  |
| D3.1   | C | 3  | 7 | 2  | 11    | 19    | 23.3  | 1.05  | 6.56  | 7.23  |
| D3.2   | C | 12 | 5 | 3  | 48.4  | 16    | 7     | 4.63  | 5.52  | 2.17  |
| D4.1   | B | 16 | 7 | 7  | 53.1  | 33.8  | 12.1  | 5.07  | 11.67 | 3.75  |
| D4.2   | C | 1  | - | -  | 4     | -     | -     | 0.38  | -     | -     |
| D4.3   | B | 8  | 1 | -  | 20.3  | 4     | -     | 1.94  | 1.38  | -     |
| D4.4   | A | 1  | - | 4  | 2     | -     | 8     | 0.19  | -     | 2.48  |
| D5     | A | 10 | 3 | -  | 47.2  | 2     | -     | 4.51  | 0.69  | -     |
| D6.1   | B | -  | 1 | -  | -     | 3     | -     | -     | 1.04  | -     |
| D7.1   | C | 2  | 4 | 1  | 8     | 12.5  | -     | 0.76  | 4.32  | -     |
| D7.2   | C | 2  | 1 | 6  | 10    | 2     | 6.2   | 0.96  | 0.69  | 1.92  |
| D8.1   | B | 4  | 2 | 6  | 20.5  | 5     | 13    | 1.96  | 1.73  | 4.03  |
| D8.3   | B | 8  | - | 2  | 24.1  | -     | 4     | 2.30  | -     | 1.24  |
| D8.4   | A | -  | 1 | -  | -     | 4     | -     | -     | 1.38  | -     |
| D9     | A | 12 | 7 | 15 | 21.3  | 9     | 17.6  | 2.04  | 3.11  | 5.46  |

|        |   |    |    |    |      |    |    |      |      |      |
|--------|---|----|----|----|------|----|----|------|------|------|
| S1.1   | A | 33 | 42 | -  | NA   | NA | -  | NA   | NA   | -    |
| S1.2   | A | 47 | -  | 19 | NA   | -  | NA | NA   | -    | NA   |
| S1.3   | A | 3  | 1  | 1  | NA   | NA | NA | NA   | NA   | NA   |
| S1.4   | A | 3  | 4  | -  | NA   | NA | -  | NA   | NA   | -    |
| S2.1   | A | 1  | 1  | -  | NA   | NA | -  | NA   | NA   | -    |
| S2.2   | B | 1  | -  | -  | NA   | -  | -  | NA   | -    | -    |
| A4     | A | 5  | -  | -  | 23.9 | -  | -  | 2.28 | -    | -    |
| I1.1   | A | 4  | 3  | 1  | 14.1 | 7  | 4  | 1.35 | 2.42 | 1.24 |
| I1.2   | B | 1  | -  | -  | NA   | -  | -  | NA   | -    | -    |
| I1.3   | A | 2  | 1  | -  | 2    | 2  | -  | 0.19 | 0.69 | -    |
| I2.1   | A | 1  | -  | -  | 3.2  | -  | -  | 0.31 | -    | -    |
| I2.1.1 | A | -  | 2  | -  | -    | 5  | -  | -    | 1.73 | -    |
| I2.2   | A | 1  | -  | -  | 5    | -  | -  | 0.48 | -    | -    |
